# Supplementary material for: Song Trait Similarity in Great Tits Varies with Social Structure
Source: PLoS One. 2015 Feb 18;10(2):e0116881. doi: 10.1371/journal.pone.0116881 (PMC4333210; doi:10.1371/journal.pone.0116881)
Supplement: S2 Table — Individual song characteristics of birds included in the song repeatability analysis. Nest box: Number of the nest box were recording took place, Recording day 1: Date of recording counting in April days (April 1st = 1), during early egg laying, Start time: Start time of dawn song in minutes before sunrise, during early egg laying, Song rate: Song rate of dawn song in number of songs per minute (first 5 minutes), during early egg laying, Recording day 2: Date of recording counting in April days (April 1st = 1), during late egg laying, Start time 2: Start time of dawn song in minutes before sunrise, during late egg laying, Song rate 2: Start time of dawn song in minutes before sunrise, during late egg laying (XLSX) [file pone.0116881.s002.xlsx]

## Sheet: Table S2
Nest box	Recording day 1	Start time	Song rate	Recording day 2	Start time 2	Song rate 2
2	21	28.35	9.8	26	39.25	8.8
12	12	30.9	7.6	17	42.7833	9.4
15	26	31.1167	5.2	30	38.1167	6.8
20	15	38.3333	7.2	19	36.7	11.6
31	33	28.1	4.6	36	21.05	3.8
32	16	41.9833	10.4	21	27.7	11.2
47	20	41.3333	8.4	23	30.4167	3.8
49	11	33.6167	9	16	30.9333	5.2
50	7	37.6667	7.2	10	29.6667	8.8
51	20	24.55	7.6	23	28.4167	3.6
53	7	35.4333	8.8	10	30.2	6.4
55	13	37.1333	6	19	39.3333	11
56	17	39.5667	15	23	33.5833	14.2
58	1	34.5667	12.8	6	36.4333	11.4
60	20	36.5333	11.2	23	27.6333	12
64	21	27.2167	10.2	26	33.85	10.6
68	15	37	8.6	20	38.7667	10.6
74	5	39.3	9.2	8	36.2333	13.6
75	11	40.6833	14.6	15	35.6	9.4
79	13	32	9.2	16	31.8167	8.8
82	13	30.8833	8.8	18	16.5	8.2
84	6	38.5833	10.6	9	27.7833	9
86	5	18.6	5	8	20.3833	3.6
88	8	15.25	7.6	12	32.35	13
90	3	13.8333	1.6	8	2.53333	7.6
93	3	40.3333	11	7	34.9667	9
94	4	40.6833	9	7	35.2167	5.4
95	9	26.0833	12.2	13	30.3	13.8
101	22	26.9	10	25	33.1333	12.8
106	12	29.75	7.8	15	33.9	2.8
109	14	19.5	7.2	18	24.4833	10.2
117	6	39.6167	5.6	10	18.2833	11.2
122	23	23.75	16.6	28	17.3667	14.2
127	1	35.8833	12.4	8	34.7	12.6
128	24	26.3833	8.4	28	21.5333	11.4
140	6	36.3	12.8	13	31.75	11
163	15	38.1333	7.8	19	22.0667	0.8
164	11	37.0167	7.2	14	40.8167	5.4
168	19	32.1667	9.8	24	16.7833	6
169	9	26.5	13	13	23.9	11.6
172	13	30.4333	9.8	16	43.7167	9
185	3	40.6	6.8	6	38.8333	16.6
203	11	25.3667	2.8	16	28.8833	6.4
320	12	23.8333	10	16	42.4833	11
333	25	38.6	8	29	27.3333	9.2
